# Supplementary material for: Deterioration of Coastal Ecosystem: A Case Study of the Banana Bay Ecological Reserve in Taiwan
Source: MDPI journal article supplement (doi:10.3390/land11091571), 2022-09-14
Supplement: s1 [file s1]

## Supplemental

**Table S1.** Literature data used in this study (1998–2020).

| Year      | Investigation Period                                                                                                                                                                                                                                              | Scope of investigation                                                                                                                                                           | Species                                                 | Total number of land crabs (F=Females, M=Males)                                         |
|-----------|-------------------------------------------------------------------------------------------------------------------------------------------------------------------------------------------------------------------------------------------------------------------|----------------------------------------------------------------------------------------------------------------------------------------------------------------------------------|---------------------------------------------------------|-----------------------------------------------------------------------------------------|
| 1998–2001 | May. 1998–Jul. 2001 (25 nights, 35 daytime; each survey lasted about 2H).                                                                                                                                                                                         | The seaside of Banana Bay (21°55'30"N, 120°49'31"E) 100 x 30 M                                                                                                                   | <i>Epigrapsus notatus</i>                               | -                                                                                       |
| 2002      | 1 Sept.–4 Oct. 2002; each full moon from June to Dec. 2003 [87]                                                                                                                                                                                                   |                                                                                                                                                                                  | <i>Gecarcoidea lalandii</i>                             | F = 438, with the highest number in July (n = 188) [87]                                 |
| 2002–2003 | 1 Sep.–4 Oct. 2002 larval release was from May 2002 to May 2003. Overnight observations carried out three times (26–27 Aug., 26–27 Sep., 25–26 Oct.). started around sunset to 2400H, and during the two weeks following full moon from Jun. to Dec. in 2003[41]. |                                                                                                                                                                                  | <i>Epigrapsus notatus</i> , Number of ovigerous females | F=47(adult)and 215(smallest), M=248[41].                                                |
| 2004      | 28 Feb. 2003–20 Feb. 2004                                                                                                                                                                                                                                         |                                                                                                                                                                                  |                                                         | F = 4540, other = 527 [43]                                                              |
| 2009      | Sampling at the end of each month from Jun. 2008 to Sep. 2009; and coastal forest patrol survey during the breeding season of land crabs, a total of 24 days                                                                                                      | 21°55'43.1"N, 120°49'38.4"E–21°55'39.4"N, 120°49'43.0"E),                                                                                                                        | Number of ovigerous females                             | F=1895                                                                                  |
| 2009      | Apr.–Dec. 2009                                                                                                                                                                                                                                                    | Data absent                                                                                                                                                                      | Total number of land crabs                              | Fuzzy data [59]                                                                         |
| 2010      | 26 Jul.–10 Sep. 2010                                                                                                                                                                                                                                              | The seaside of Banana Bay coastal forest (21° 55' 30" N, 120° 49' 31" E) 100*30M                                                                                                 | Number of ovigerous land crabs                          | 4072                                                                                    |
| 2010      | Jan.–Nov. 2010                                                                                                                                                                                                                                                    | A: 21°55'43.1"N, 120°49'38.4"E –21°55'39.4"N, 120°49'43.0"E), B: 21°55'25.2"N, 120°49'58.9"E –21°55'22.6"N, 120°50'00.0"E                                                        | Total number of land crabs                              | Fuzzy data [51]                                                                         |
| 2015      | 16 days, 11,13 Jun.; 30,31Jul; 1,2 Aug.; 1,2,7–10 Sep.; 9,27–29 Oct., 2015                                                                                                                                                                                        | 100 m off the coastal forest (21°55'25.2"N, 120°49'58.9"E–21°55'22.6"N, 120°50'00.0"E)                                                                                           | Number of ovigerous land crabs                          | F = 544 [101]                                                                           |
| 2019      | 26 Jun.–28 Nov. 2019                                                                                                                                                                                                                                              | 39.5 KM to 41.5 KM: the mountainside of Banana Bay coastal forest                                                                                                                | Number of ovigerous land crabs and roadkill land crabs  | Road kill $n = 3210$ / ovigerous land crabs, $n = 802$                                  |
| 2020      | May 2019–Oct. 2020                                                                                                                                                                                                                                                | Sample Area A is 150 m long and is the seaside of TPA 26 section 38.95 KM to 39.1 KM. Sample Area B is 200 m long and is the seaside of TPH 26 section 39.75 KM to 39.95 KM [53] | All land crabs and roadkill land crabs [53]             | Area A, ovigerous land crabs, $n = 200$ ; Area B, ovigerous land crabs, $n = 1295$ [53] |
